# Supplementary material for: Conserving Biogeography: Habitat Loss and Vicariant Patterns in Endemic Squamates of the Cerrado Hotspot
Source: PLoS One. 2015 Aug 7;10(8):e0133995. doi: 10.1371/journal.pone.0133995 (PMC4529144; doi:10.1371/journal.pone.0133995)
Supplement: S2 Table — Legend: BE: Biotic Element numbered and named as in Nogueira et al. (2011). Denomination: Biotic element's denomination as in Nogueira et al. (2011). D: Kolmogorov-Smirnov test result. P-value: For the statistical analyses we considered a significance level of 0.05. (XLSX) [file pone.0133995.s003.xlsx]

## Sheet: Plan1
SUPPORTING INFORMATION
PLoS ONE
Conserving biogeography: habitat loss and vicariant patterns in endemic Squamates of the Cerrado hotspot
Pietro L.H. de Mello, Ricardo B. Machado and Cristiano C. Nogueira
S2 Table Area loss comparison within biotic elements
Legend: BE: Biotic Element numeration as in Nogueira et al. (2011). Denomination: Biotic element's denomination as in Nogueira et al. (2011). D: Kolmogorov-Smirnov test result. P-value: For the statistical analyses we considered a significance level of 0.05
BE	Denomination	D	p-value
1	Tocatins-Serra Geral	0.1818	0.9971
2	Paraguay-Guaporé	0.1667	1
3	Paraná-Paraguay	0.125	1
4	Guimarães-Roncador	0.2857	0.9375
5	Espinhaço	0.2857	0.9375
6	Araguaia	0.2	1
7	Central Plateau	0.25	1
